# Supplementary material for: Crosstalk between macrophages and astrocytes affects proliferation, reactive phenotype and inflammatory response, suggesting a role during reactive gliosis following spinal cord injury
Source: Springer Nature journal article supplement (doi:10.1186/s12974-015-0327-3), 2015-05-29
Supplement: MOESM1 [file 12974_2015_327_MOESM1_ESM.pdf]

**Supplementary data**

| Table S1: Sequences and product sizes for reactive astrocyte genes investigated by qPCR |                            |                   |
|-----------------------------------------------------------------------------------------|----------------------------|-------------------|
| Gene                                                                                    | Sequences                  | Product size (bp) |
| <i>gfap</i>                                                                             | 5'-GCTCCAAGATGAAACCAACCTG  | 124               |
|                                                                                         | 5'-CTCCTCCAGCGATTCAACCTT   |                   |
| <i>nestin</i>                                                                           | 5'-GTCCCTTAGTCTGGAAGTGGC   | 112               |
|                                                                                         | 5'-CTTGGGGTCAGGAAAGCCAA    |                   |
| <i>vimentin</i>                                                                         | 5'-GCGAGAGAAATTGCAGGAGGA   | 111               |
|                                                                                         | 5'-CGTTCAAGGTCAAGACGTGC    |                   |
| <i>cdk1</i>                                                                             | 5'-ACAGAGAGGGTCCGTCGTAA    | 115               |
|                                                                                         | 5'-GCCAGTGACTCTGTGTCTACC   |                   |
| <i>ccnb1</i>                                                                            | 5'-ACAACGGTGAATGGACACCA    | 113               |
|                                                                                         | 5'-GAGGCCACAGTTCACCATGA    |                   |
| <i>ccnb1</i>                                                                            | 5'-CCATGCTCAAGACGGAGGAG    | 117               |
|                                                                                         | 5'-CACAGACCTCCAGCATCCAG    |                   |
| <i>mki67</i>                                                                            | 5'-GGACCATGGCGTCCTCG       | 105               |
|                                                                                         | 5'-CAATACTCCTTCCAAACAGGCAG |                   |
| <i>lcn2</i>                                                                             | 5'-TGTCACCTCCATCCTGGTCA    | 124               |
|                                                                                         | 5'-CTGTACCTGAGGATACCTGTGC  |                   |
| <i>serpina3</i>                                                                         | 5'-CTCTCAGGTGGTCCACAAGG    | 107               |
|                                                                                         | 5'-GAGGGTACAGTTTCGCAGACA   |                   |
| <i>gapdh</i>                                                                            | 5'-AGGTCGGTGTGAACGGATTTG   | 123               |
|                                                                                         | 5'-TGTAGACCATGTAGTTGAGGTCA |                   |
